# Supplementary material for: Maqui berry extract prevents cigarette smoke induced oxidative stress in human osteoblasts in vitro
Source: PubMed Central journal article supplement (PMC7898044; doi:10.17179/excli2020-3244), 2021-02-09
Supplement: EXCLI-20-281-s-001.pdf [file EXCLI-20-281-s-001.pdf]

**Supplementary data to:**

**Original article:**

**MAQUI BERRY EXTRACT PREVENTS CIGARETTE SMOKE  
INDUCED OXIDATIVE STRESS IN HUMAN OSTEOBLASTS  
*IN VITRO***

Sheng Zhu, Romina H. Aspera-Werz, Tao Chen, Weidong Weng, Bianca Braun,  
Tina Histing, Andreas K. Nüssler\*

Department of Traumatology, Eberhard Karls University Tübingen, BG Clinic, Siegfried  
Weller Institute, Schnarrenbergstraße 95, 72076 Tübingen, Germany

\* **Corresponding author:** Andreas K. Nüssler, Department of Traumatology, Eberhard  
Karls University Tübingen, BG Clinic, Siegfried Weller Institute, Schnarrenbergstraße 95,  
72076 Tübingen, Germany. Tel.: +49-7071-606-1065;  
E-mail: [andreas.nuessler@med.uni-tuebingen.de](mailto:andreas.nuessler@med.uni-tuebingen.de)

<https://orcid.org/0000-0002-6666-6791> (Andreas Nussler)

<http://dx.doi.org/10.17179/excli2020-3244>

This is an Open Access article distributed under the terms of the Creative Commons Attribution License  
(<http://creativecommons.org/licenses/by/4.0/>).

**Raw data of Figure 2A: Resazurin conversion of hOBs exposed to different concentrations of MBE on day 1, day 3, and day 7**

**Day 1**

| <i>Raw data</i>            |           |             |             |             |              |             |
|----------------------------|-----------|-------------|-------------|-------------|--------------|-------------|
|                            | <b>25</b> | <b>6.25</b> | <b>3.12</b> | <b>1.56</b> | <b>0.156</b> | <b>Ctrl</b> |
| R1                         | 956.6667  | 3979.667    | 4171.667    | 5835.667    | 5264.667     | 5119.667    |
|                            | 1076.667  | 2760.667    | 4660.667    | 5937.667    | 6238.667     | 5529.667    |
|                            | 1857.667  | 5686.667    | 4875.667    | 5723.667    | 5504.667     | 5621.667    |
|                            |           |             |             |             |              |             |
| R2                         | 41.33333  | 2969.333    | 2423.333    | 1697.333    | 3485.333     | 3607.333    |
|                            | 210.3333  | 2216.333    | 4143.333    | 2401.333    | 4286.333     | 2862.333    |
|                            | 67.33333  | 3309.333    | 2747.333    | 4514.333    | 3978.333     | 1730.333    |
|                            |           |             |             |             |              |             |
| R3                         | 721.3333  | 4133.333    | 1891.333    | 3996.333    | 1801.333     | 3567.333    |
|                            | 2041.333  | 1903.333    | 4560.333    | 4057.333    | 3029.333     | 2674.333    |
|                            | 2249.333  | 4601.333    | 4304.333    | 5083.333    | 3483.333     | 4505.333    |
|                            |           |             |             |             |              |             |
| <i>Fold change of Ctrl</i> |           |             |             |             |              |             |
|                            | <b>25</b> | <b>6.25</b> | <b>3.12</b> | <b>1.56</b> | <b>0.156</b> | <b>Ctrl</b> |
| R1                         | 0.176387  | 0.733759    | 0.76916     | 1.075963    | 0.970684     | 0.943949    |
|                            | 0.198513  | 0.509004    | 0.85932     | 1.09477     | 1.150267     | 1.019544    |
|                            | 0.342511  | 1.048491    | 0.898961    | 1.055313    | 1.014935     | 1.036507    |
|                            |           |             |             |             |              |             |
| R2                         | 0.015122  | 1.086341    | 0.886585    | 0.620976    | 1.275122     | 1.319756    |
|                            | 0.076951  | 0.810854    | 1.515854    | 0.878537    | 1.568171     | 1.047195    |
|                            | 0.024634  | 1.210732    | 1.005122    | 1.651585    | 1.455488     | 0.633049    |
|                            |           |             |             |             |              |             |
| R3                         | 0.120766  | 0.692003    | 0.316647    | 0.669066    | 0.301579     | 0.597243    |
|                            | 0.34176   | 0.318656    | 0.763491    | 0.679279    | 0.507171     | 0.447737    |
|                            | 0.376584  | 0.770355    | 0.720632    | 0.851052    | 0.58318      | 0.754283    |
| AVG                        | 0.2481    | 0.9299      | 0.9931      | 1.116       | 1.084        | 1.000       |
| SEM                        | 0.07453   | 0.09732     | 0.09859     | 0.09762     | 0.1079       | 0.07213     |

**Day 3**

| <i>Raw data</i> |           |             |             |             |              |             |
|-----------------|-----------|-------------|-------------|-------------|--------------|-------------|
|                 | <b>25</b> | <b>6.25</b> | <b>3.12</b> | <b>1.56</b> | <b>0.156</b> | <b>Ctrl</b> |
| R1              | 1113.667  | 2305.667    | 4673.667    | 5025.667    | 5585.667     | 4272.667    |
|                 | 33.66667  | 4057.667    | 3651.667    | 5468.667    | 5047.667     | 3068.667    |
|                 | 1313.667  | 4231.667    | 4493.667    | 4409.667    | 4360.667     | 4420.667    |
|                 |           |             |             |             |              |             |
| R2              | 417.6667  | 1922.667    | 2262.667    | 3342.667    | 2846.667     | 2423.667    |
|                 | 1656.667  | 2314.667    | 2825.667    | 2849.667    | 2735.667     | 2742.667    |
|                 | 1680.667  | 2541.667    | 2710.667    | 2406.667    | 2417.667     | 2534.667    |
|                 |           |             |             |             |              |             |
| R3              | 964.6667  | 2957.667    | 2747.667    | 2541.667    | 2549.667     | 2050.667    |
|                 | 462.6667  | 2932.667    | 2830.667    | 2622.667    | 2782.667     | 2271.667    |
|                 | 659.6667  | 3099.667    | 3607.667    | 3020.667    | 2983.667     | 2373.667    |

| <b>Fold change of Crl</b> |           |             |             |             |              |            |
|---------------------------|-----------|-------------|-------------|-------------|--------------|------------|
|                           | <b>25</b> | <b>6.25</b> | <b>3.12</b> | <b>1.56</b> | <b>0.156</b> | <b>Crl</b> |
| R1                        | 0.28405   | 0.58808     | 1.192059    | 1.28184     | 1.424673     | 1.089781   |
|                           | 0.008587  | 1.034943    | 0.931389    | 1.394831    | 1.287451     | 0.78269    |
|                           | 0.335062  | 1.079323    | 1.146149    | 1.124724    | 1.112226     | 1.127529   |
|                           |           |             |             |             |              |            |
| R2                        | 0.162706  | 0.748994    | 0.881444    | 1.302169    | 1.108947     | 0.944163   |
|                           | 0.645371  | 0.901701    | 1.100766    | 1.110116    | 1.065706     | 1.068433   |
|                           | 0.65472   | 0.990131    | 1.055967    | 0.937541    | 0.941826     | 0.987404   |
|                           |           |             |             |             |              |            |
| R3                        | 0.432198  | 1.325119    | 1.231033    | 1.13874     | 1.142324     | 0.918757   |
|                           | 0.207288  | 1.313919    | 1.26822     | 1.17503     | 1.246714     | 1.017772   |
|                           | 0.29555   | 1.38874     | 1.616338    | 1.353345    | 1.336768     | 1.063471   |
| AVG                       | 0.3362    | 1.041       | 1.158       | 1.202       | 1.185        | 1.000      |
| SEM                       | 0.07117   | 0.09053     | 0.07172     | 0.04796     | 0.05015      | 0.03544    |

**Day 7**

| <b>Raw data</b>           |           |             |             |             |              |            |
|---------------------------|-----------|-------------|-------------|-------------|--------------|------------|
|                           | <b>25</b> | <b>6.25</b> | <b>3.12</b> | <b>1.56</b> | <b>0.156</b> | <b>Crl</b> |
| R1                        | 4021      | 6379        | 7629        | 6187        | 6358         | 8027       |
|                           | 4368      | 5650        | 6236        | 6775        | 7053         | 8228       |
|                           | 4516      | 5117        | 5200        | 6369        | 6256         | 6238       |
|                           |           |             |             |             |              |            |
| R2                        | 164.6667  | 834.6667    | 1826.667    | 998.6667    | 1345.667     | 3119.667   |
|                           | 46.66667  | 2272.667    | 2147.667    | 2779.667    | 1389.667     | 1523.667   |
|                           | 77.66667  | 3287.667    | 677.6667    | 3045.667    | 871.6667     | 3464.667   |
|                           |           |             |             |             |              |            |
| R3                        | 680.6667  | 3440.667    | 3437.667    | 3617.667    | 2178.667     | 2039.667   |
|                           | 389.6667  | 3288.667    | 3773.667    | 3569.667    | 1229.667     | 3395.667   |
|                           | 116.6667  | 3532.667    | 1366.667    | 3507.667    | 3993.667     | 2771.667   |
|                           |           |             |             |             |              |            |
| <b>Fold change of Crl</b> |           |             |             |             |              |            |
|                           | <b>25</b> | <b>6.25</b> | <b>3.12</b> | <b>1.56</b> | <b>0.156</b> | <b>Crl</b> |
| R1                        | 0.5363    | 0.850798    | 1.017517    | 0.82519     | 0.847997     | 1.0706     |
|                           | 0.582581  | 0.753568    | 0.831725    | 0.903614    | 0.940693     | 1.097408   |
|                           | 0.602321  | 0.682479    | 0.693549    | 0.849464    | 0.834393     | 0.831992   |
|                           |           |             |             |             |              |            |
| R2                        | 0.060927  | 0.308831    | 0.675876    | 0.369512    | 0.497903     | 1.154292   |
|                           | 0.017267  | 0.840898    | 0.794647    | 1.02849     | 0.514184     | 0.563764   |
|                           | 0.028737  | 1.216453    | 0.25074     | 1.126912    | 0.322521     | 1.281944   |
|                           |           |             |             |             |              |            |
| R3                        | 0.248812  | 1.257707    | 1.25661     | 1.322408    | 0.796393     | 0.745583   |
|                           | 0.142439  | 1.202145    | 1.379432    | 1.304862    | 0.449494     | 1.241257   |
|                           | 0.042647  | 1.291337    | 0.499574    | 1.282198    | 1.459851     | 1.013159   |
| AVG                       | 0.2513    | 0.9338      | 0.8222      | 1.001       | 0.7404       | 1.000      |
| SEM                       | 0.07988   | 0.1149      | 0.1023      | 0.1183      | 0.1110       | 0.08417    |

**Raw data of Figure 2B: SRB staining of hOBs exposed to different concentrations of MBE on day 1, day 3, and day 7**

**Day 1**

| <i>Raw data</i>            |           |             |             |             |              |             |
|----------------------------|-----------|-------------|-------------|-------------|--------------|-------------|
|                            | <b>25</b> | <b>6.25</b> | <b>3.12</b> | <b>1.56</b> | <b>0.156</b> | <b>Ctrl</b> |
| R1                         | 0.0295    | 0.0535      | 0.1575      | 0.2085      | 0.1765       | 0.1635      |
|                            | 0.0535    | 0.0845      | 0.1465      | 0.1745      | 0.2225       | 0.1395      |
|                            | 0.0695    | 0.1615      | 0.1475      | 0.1795      | 0.2275       | 0.1995      |
|                            |           |             |             |             |              |             |
| R2                         | 0.033     | 0.086       | 0.069       | 0.158       | 0.136        | 0.132       |
|                            | 0.045     | 0.157       | 0.106       | 0.175       | 0.202        | 0.138       |
|                            | 0.089     | 0.117       | 0.149       | 0.16        | 0.163        | 0.154       |
|                            |           |             |             |             |              |             |
| R3                         | 0.17      | 0.178       | 0.207       | 0.295       | 0.233        | 0.221       |
|                            | 0.169     | 0.243       | 0.215       | 0.155       | 0.151        | 0.213       |
|                            | 0.157     | 0.253       | 0.241       | 0.209       | 0.181        | 0.227       |
|                            |           |             |             |             |              |             |
| <i>Fold change of Ctrl</i> |           |             |             |             |              |             |
|                            | <b>25</b> | <b>6.25</b> | <b>3.12</b> | <b>1.56</b> | <b>0.156</b> | <b>Ctrl</b> |
| R1                         | 0.176119  | 0.319403    | 0.940299    | 1.244776    | 1.053731     | 0.976119    |
|                            | 0.319403  | 0.504478    | 0.874627    | 1.041791    | 1.328358     | 0.832836    |
|                            | 0.414925  | 0.964179    | 0.880597    | 1.071642    | 1.358209     | 1.191045    |
|                            |           |             |             |             |              |             |
| R2                         | 0.14248   | 0.562005    | 0.427441    | 1.131926    | 0.957784     | 0.926121    |
|                            | 0.237467  | 1.124011    | 0.720317    | 1.266491    | 1.480211     | 0.973615    |
|                            | 0.585752  | 0.807388    | 1.060686    | 1.147757    | 1.171504     | 1.100264    |
|                            |           |             |             |             |              |             |
| R3                         | 0.75487   | 0.793831    | 0.935065    | 1.363636    | 1.061688     | 1.003247    |
|                            | 0.75      | 1.11039     | 0.974026    | 0.681818    | 0.662338     | 0.964286    |
|                            | 0.691558  | 1.159091    | 1.100649    | 0.944805    | 0.808442     | 1.032468    |
| AVG                        | 0.4525    | 0.8161      | 0.8793      | 1.099       | 1.098        | 1.000       |
| SEM                        | 0.03407   | 0.08889     | 0.06715     | 0.06741     | 0.1007       | 0.08272     |

**Day 3**

| <i>Raw data</i> |           |             |             |             |              |             |
|-----------------|-----------|-------------|-------------|-------------|--------------|-------------|
|                 | <b>25</b> | <b>6.25</b> | <b>3.12</b> | <b>1.56</b> | <b>0.156</b> | <b>Ctrl</b> |
| R1              | 0.0985    | 0.0875      | 0.2185      | 0.2675      | 0.2355       | 0.2735      |
|                 | 0.0375    | 0.2195      | 0.2185      | 0.3715      | 0.2825       | 0.3325      |
|                 | 0.2765    | 0.2975      | 0.3025      | 0.3355      | 0.3725       | 0.2965      |
|                 |           |             |             |             |              |             |
| R2              | 0.016     | 0.126       | 0.121       | 0.189       | 0.122        | 0.146       |
|                 | 0.013     | 0.126       | 0.122       | 0.124       | 0.123        | 0.137       |
|                 | 0.05      | 0.133       | 0.139       | 0.131       | 0.134        | 0.131       |
|                 |           |             |             |             |              |             |
| R3              | 0.078     | 0.111       | 0.078       | 0.201       | 0.168        | 0.239       |
|                 | 0.072     | 0.18        | 0.17        | 0.146       | 0.16         | 0.206       |
|                 | 0.087     | 0.15        | 0.053       | 0.23        | 0.197        | 0.181       |

| <b>Fold change of Crl</b> |           |             |             |             |              |            |
|---------------------------|-----------|-------------|-------------|-------------|--------------|------------|
|                           | <b>25</b> | <b>6.25</b> | <b>3.12</b> | <b>1.56</b> | <b>0.156</b> | <b>Crl</b> |
| R1                        | 0.327424  | 0.290859    | 0.726316    | 0.889197    | 0.782825     | 0.909141   |
|                           | 0.124654  | 0.72964     | 0.726316    | 1.234903    | 0.939058     | 1.105263   |
|                           | 0.919114  | 0.98892     | 1.00554     | 1.115235    | 1.238227     | 0.985596   |
|                           |           |             |             |             |              |            |
| R2                        | 0.115942  | 0.913043    | 0.876812    | 1.369565    | 0.884058     | 1.057971   |
|                           | 0.094203  | 0.913043    | 0.884058    | 0.898551    | 0.891304     | 0.992754   |
|                           | 0.362319  | 0.963768    | 1.007246    | 0.949275    | 0.971014     | 0.949275   |
|                           |           |             |             |             |              |            |
| R3                        | 0.373802  | 0.531949    | 0.373802    | 0.963259    | 0.805112     | 1.145367   |
|                           | 0.345048  | 0.86262     | 0.814696    | 0.699681    | 0.766773     | 0.98722    |
|                           | 0.416933  | 0.71885     | 0.253994    | 1.102236    | 0.944089     | 0.867412   |
| AVG                       | 0.3422    | 0.7681      | 0.7410      | 1.025       | 0.9136       | 1.000      |
| SEM                       | 0.08334   | 0.07687     | 0.08801     | 0.06736     | 0.04744      | 0.02991    |

**Day 7**

| <b>Raw data</b>           |           |             |             |             |              |            |
|---------------------------|-----------|-------------|-------------|-------------|--------------|------------|
|                           | <b>25</b> | <b>6.25</b> | <b>3.12</b> | <b>1.56</b> | <b>0.156</b> | <b>Crl</b> |
| R1                        | 0.0535    | 0.2535      | 0.2965      | 0.1825      | 0.1815       | 0.2425     |
|                           | 0.1585    | 0.2145      | 0.2195      | 0.2665      | 0.2765       | 0.2415     |
|                           | 0.1765    | 0.2315      | 0.2395      | 0.2115      | 0.2565       | 0.2725     |
|                           |           |             |             |             |              |            |
| R2                        | 0.036     | 0.139       | 0.139       | 0.248       | 0.165        | 0.15       |
|                           | 0.114     | 0.153       | 0.153       | 0.173       | 0.177        | 0.171      |
|                           | 0.027     | 0.197       | 0.185       | 0.199       | 0.233        | 0.209      |
|                           |           |             |             |             |              |            |
| R3                        | 0.122     | 0.139       | 0.106       | 0.189       | 0.15         | 0.201      |
|                           | 0.121     | 0.122       | 0.189       | 0.224       | 0.175        | 0.195      |
|                           | 0.118     | 0.095       | 0.182       | 0.278       | 0.25         | 0.166      |
| <b>Fold change of Crl</b> |           |             |             |             |              |            |
|                           | <b>25</b> | <b>6.25</b> | <b>3.12</b> | <b>1.56</b> | <b>0.156</b> | <b>Crl</b> |
| R1                        | 0.212161  | 1.005288    | 1.17581     | 0.723728    | 0.719762     | 0.961666   |
|                           | 0.628553  | 0.850628    | 0.870456    | 1.056841    | 1.096497     | 0.9577     |
|                           | 0.699934  | 0.918044    | 0.949769    | 0.838731    | 1.017184     | 1.080635   |
|                           |           |             |             |             |              |            |
| R2                        | 0.203774  | 0.786792    | 0.786792    | 1.403774    | 0.933962     | 0.849057   |
|                           | 0.645283  | 0.866038    | 0.866038    | 0.979245    | 1.001887     | 0.967925   |
|                           | 0.15283   | 1.115094    | 1.04717     | 1.126415    | 1.318868     | 1.183019   |
|                           |           |             |             |             |              |            |
| R3                        | 0.651246  | 0.741993    | 0.565836    | 1.008897    | 0.800712     | 1.072954   |
|                           | 0.645907  | 0.651246    | 1.008897    | 1.19573     | 0.934164     | 1.040925   |
|                           | 0.629893  | 0.507117    | 0.97153     | 1.483986    | 1.33452      | 0.886121   |
| AVG                       | 0.4966    | 0.8269      | 0.9158      | 1.091       | 1.018        | 1.000      |
| SEM                       | 0.07725   | 0.06092     | 0.05791     | 0.08194     | 0.06946      | 0.03477    |

**Raw data of Figure 2D: ROS level measurements of hOBs exposed to different concentrations of MBE on day 1**

| <b>Raw data</b>            |             |              |             |             |             |           |                                   |
|----------------------------|-------------|--------------|-------------|-------------|-------------|-----------|-----------------------------------|
|                            | <b>Ctrl</b> | <b>0.156</b> | <b>1.56</b> | <b>3.12</b> | <b>6.25</b> | <b>25</b> | <b>H<sub>2</sub>O<sub>2</sub></b> |
| R1                         | 202         | 188          | 264         | 277         | 580         | 560       | 2289                              |
|                            | 254         | 204          | 274         | 294         | 374         | 532       | 2389                              |
|                            | 195         | 202          | 280         | 329         | 394         | 549       | 2419                              |
|                            |             |              |             |             |             |           |                                   |
| R2                         | 190         | 179          | 161         | 288         | 831         | 600       | 1887                              |
|                            | 248         | 199          | 274         | 317         | 421         | 582       | 2113                              |
|                            | 200         | 208          | 178         | 331         | 417         | 592       | 2009                              |
|                            |             |              |             |             |             |           |                                   |
| R3                         | 202         | 182          | 272         | 491         | 830         | 602       | 1791                              |
|                            | 244         | 205          | 275         | 306         | 412         | 567       | 1681                              |
|                            | 193         | 204          | 86          | 331         | 424         | 595       | 1909                              |
| <b>Fold change of Ctrl</b> |             |              |             |             |             |           |                                   |
|                            | <b>Ctrl</b> | <b>0.156</b> | <b>1.56</b> | <b>3.12</b> | <b>6.25</b> | <b>25</b> | <b>H<sub>2</sub>O<sub>2</sub></b> |
| R1                         | 1           | 0.930693     | 1.306931    | 1.371287    | 2.871287    | 2.772277  | 11.33168                          |
|                            | 1           | 0.80315      | 1.07874     | 1.15748     | 1.472441    | 2.094488  | 9.405512                          |
|                            | 1           | 1.035897     | 1.435897    | 1.687179    | 2.020513    | 2.815385  | 12.40513                          |
|                            |             |              |             |             |             |           |                                   |
| R2                         | 1           | 0.942105     | 0.847368    | 1.515789    | 4.373684    | 3.157895  | 9.931579                          |
|                            | 1           | 0.802419     | 1.104839    | 1.278226    | 1.697581    | 2.346774  | 8.520161                          |
|                            | 1           | 1.04         | 0.89        | 1.655       | 2.085       | 2.96      | 10.045                            |
|                            |             |              |             |             |             |           |                                   |
| R3                         | 1           | 0.90099      | 1.346535    | 2.430693    | 4.108911    | 2.980198  | 8.866337                          |
|                            | 1           | 0.840164     | 1.127049    | 1.254098    | 1.688525    | 2.32377   | 6.889344                          |
|                            | 1           | 1.056995     | 0.445596    | 1.715026    | 2.196891    | 3.082902  | 9.891192                          |
| AVG                        | 1.000       | 0.9280       | 1.065       | 1.563       | 2.502       | 2.726     | 1.000                             |
| SEM                        | 0.000       | 0.03351      | 0.1016      | 0.1280      | 0.3553      | 0.1263    | 0.000                             |

**Raw data of Figure 2E: ROS level measurements of hOBs exposed to different concentrations of MBE on day 3**

| <b>Raw data</b>            |             |              |             |             |             |           |                                   |
|----------------------------|-------------|--------------|-------------|-------------|-------------|-----------|-----------------------------------|
|                            | <b>Ctrl</b> | <b>0.156</b> | <b>1.56</b> | <b>3.12</b> | <b>6.25</b> | <b>25</b> | <b>H<sub>2</sub>O<sub>2</sub></b> |
| R1                         | 183         | 191          | 172         | 224         | 214         | 269       | 1789                              |
|                            | 189         | 178          | 213         | 185         | 270         | 298       | 1671                              |
|                            | 139         | 231          | 210         | 212         | 240         | 255       | 1983                              |
|                            |             |              |             |             |             |           |                                   |
| R2                         | 185         | 218          | 181         | 232         | 221         | 351       | 1567                              |
|                            | 191         | 202          | 228         | 184         | 261         | 301       | 1987                              |
|                            | 156         | 224          | 212         | 212         | 244         | 259       | 1789                              |
|                            |             |              |             |             |             |           |                                   |
| R3                         | 189         | 216          | 280         | 223         | 221         | 250       | 1516                              |
|                            | 188         | 204          | 221         | 299         | 267         | 301       | 1489                              |
|                            | 165         | 136          | 212         | 214         | 251         | 340       | 1781                              |
| <b>Fold change of Ctrl</b> |             |              |             |             |             |           |                                   |
|                            | <b>Ctrl</b> | <b>0.156</b> | <b>1.56</b> | <b>3.12</b> | <b>6.25</b> | <b>25</b> | <b>H<sub>2</sub>O<sub>2</sub></b> |
| R1                         | 1           | 1.043716     | 0.939891    | 1.224044    | 1.169399    | 1.469945  | 9.775956                          |
|                            | 1           | 0.941799     | 1.126984    | 0.978836    | 1.428571    | 1.57672   | 8.84127                           |
|                            | 1           | 1.661871     | 1.510791    | 1.52518     | 1.726619    | 1.834532  | 14.26619                          |
|                            |             |              |             |             |             |           |                                   |
| R2                         | 1           | 1.178378     | 0.978378    | 1.254054    | 1.194595    | 1.897297  | 8.47027                           |
|                            | 1           | 1.057592     | 1.193717    | 0.963351    | 1.366492    | 1.575916  | 10.40314                          |
|                            | 1           | 1.435897     | 1.358974    | 1.358974    | 1.564103    | 1.660256  | 11.46795                          |
|                            |             |              |             |             |             |           |                                   |
| R3                         | 1           | 1.142857     | 1.481481    | 1.179894    | 1.169312    | 1.322751  | 8.021164                          |
|                            | 1           | 1.085106     | 1.175532    | 1.590426    | 1.420213    | 1.601064  | 7.920213                          |
|                            | 1           | 0.824242     | 1.284848    | 1.29697     | 1.521212    | 2.060606  | 10.79394                          |
| AVG                        | 1.000       | 1.152        | 1.228       | 1.264       | 1.396       | 1.667     | 1.000                             |
| SEM                        | 0.000       | 0.08483      | 0.06709     | 0.07123     | 0.06445     | 0.07585   | 0.000                             |

**Raw data of Figure 3A: The ROS level of hOBs under different exposure strategies of CSE and MBE**

| <b>Raw data</b>           |                                   |            |              |            |             |            |
|---------------------------|-----------------------------------|------------|--------------|------------|-------------|------------|
|                           | <b>H<sub>2</sub>O<sub>2</sub></b> | <b>CSE</b> | <b>Maqui</b> | <b>Co-</b> | <b>Pre-</b> | <b>Crl</b> |
| R1                        | 7352                              | 4534       | 2469         | 3221       | 3185        | 2203       |
|                           | 5813                              | 3485       | 1861         | 2506       | 2417        | 1446       |
|                           | 4463                              | 2789       | 1401         | 2085       | 1972        | 1302       |
|                           | 4674                              | 3188       | 1515         | 2460       | 2310        | 1418       |
|                           | 5999                              | 3357       | 1516         | 2462       | 1516        | 1372       |
|                           | 5533                              | 2965       | 1385         | 2551       | 2154        | 1284       |
| R2                        | 1450                              | 1350       | 1237         | 1280       | 1277        | 1219       |
|                           | 1830                              | 1640       | 1365         | 1486       | 1446        | 1309       |
|                           | 1697                              | 1556       | 1320         | 1446       | 1412        | 1313       |
|                           | 1938                              | 1784       | 1425         | 1629       | 1604        | 1384       |
|                           | 1783                              | 1581       | 1311         | 1451       | 1296        | 1289       |
|                           | 1874                              | 1603       | 1344         | 1546       | 1484        | 1296       |
| R3                        | 2622                              | 1988       | 1517         | 1596       | 1659        | 1408       |
|                           | 2235                              | 1784       | 1432         | 1476       | 1527        | 1400       |
|                           | 2571                              | 1973       | 1491         | 1548       | 1582        | 1423       |
|                           | 2512                              | 1838       | 1414         | 1446       | 1472        | 1388       |
|                           | 2134                              | 1614       | 1366         | 1408       | 1427        | 1331       |
|                           | 2694                              | 2156       | 1438         | 1539       | 1552        | 1377       |
| <b>Fold change of Crl</b> |                                   |            |              |            |             |            |
|                           | <b>H<sub>2</sub>O<sub>2</sub></b> | <b>CSE</b> | <b>Maqui</b> | <b>Co-</b> | <b>Pre-</b> | <b>Crl</b> |
| R1                        | 3.3372674                         | 2.0581026  | 1.1207444    | 1.4620971  | 1.4457558   | 1          |
|                           | 4.0200553                         | 2.4100968  | 1.2869986    | 1.7330567  | 1.6715076   | 1          |
|                           | 3.4278034                         | 2.1420891  | 1.0760369    | 1.6013825  | 1.5145929   | 1          |
|                           | 3.2961918                         | 2.248237   | 1.0684062    | 1.7348378  | 1.629055    | 1          |
|                           | 4.372449                          | 2.446793   | 1.1049563    | 1.7944606  | 1.1049563   | 1          |
|                           | 4.30919                           | 2.30919    | 1.0786604    | 1.9867601  | 1.6775701   | 1          |
| R2                        | 2.946903                          | 2.106195   | 1.159292     | 1.517699   | 1.49115     | 1          |
|                           | 3.494565                          | 2.586957   | 1.271739     | 1.847826   | 1.657609    | 1          |
|                           | 2.806122                          | 2.142857   | 1.035714     | 1.627551   | 1.469388    | 1          |
|                           | 2.952941                          | 2.411765   | 1.147059     | 1.864706   | 1.776471    | 1          |
|                           | 3.617834                          | 2.547771   | 1.121019     | 1.859873   | 1.038217    | 1          |
|                           | 3.953846                          | 2.569231   | 1.246154     | 2.276923   | 1.961538    | 1          |
| R3                        | 5.401003                          | 3.102757   | 1.39599      | 1.684211   | 1.912281    | 1          |
|                           | 4.118492                          | 2.43447    | 1.120287     | 1.287253   | 1.475763    | 1          |
|                           | 4.947589                          | 2.893082   | 1.234801     | 1.431866   | 1.549266    | 1          |
|                           | 5.394191                          | 2.761411   | 1.103734     | 1.228216   | 1.329876    | 1          |
|                           | 5.039419                          | 2.423237   | 1.176349     | 1.390041   | 1.485477    | 1          |
|                           | 6.379501                          | 4.180055   | 1.252078     | 1.66482    | 1.714681    | 1          |
| AVG                       | 4.101                             | 2.543      | 1.167        | 1.666      | 1.550       | 1.000      |
| SEM                       | 0.2351                            | 0.1161     | 0.02240      | 0.06124    | 0.05623     | 0.000      |



Raw data of Figure 3B: The Nitrotyrosine level of hOBs under different exposure strategies of CSE and MBE (Area under curve). On Day 4 and Day 7, Pre-incubation group had the same exposure condition as MBE group and Post-incubation group had the same exposure condition as CSE group, so only 4 groups are shown on Day 4 and Day 7.

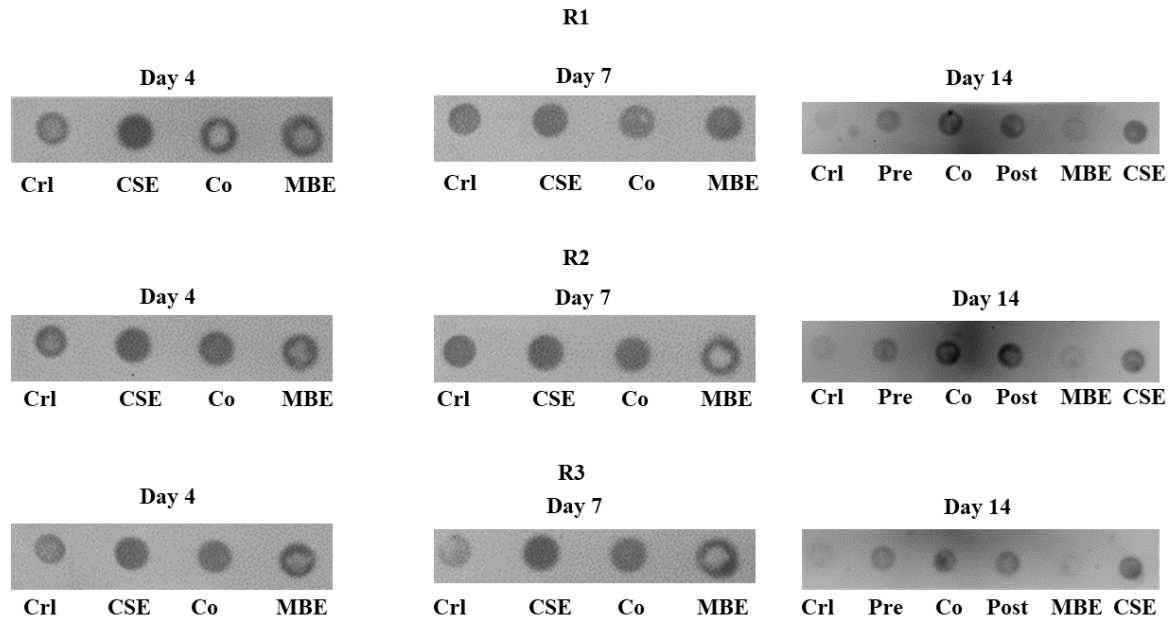

**Raw data of Figure 4A, 5A, 5B and 5C: PCR measurements of Nrf2, SOD2, CAT and GPX**

**Nrf2**

| <b>Raw data</b>           |            |            |           |             |            |            |
|---------------------------|------------|------------|-----------|-------------|------------|------------|
|                           | <b>Crl</b> | <b>Pre</b> | <b>Co</b> | <b>Post</b> | <b>MBE</b> | <b>CSE</b> |
| R1                        | 3.504      | 44.0391    | 45.70335  | 39.61333    | 25.8243    | 9.114838   |
|                           | 3.041      | 50.16783   | 32.42128  | 35.31589    | 22.69755   | 7.098545   |
| R2                        | 1.571      | 19.03933   | 5.633157  | 14.42995    | 6.560413   | 10.03068   |
|                           | 13.461     | 74.98459   | 55.97962  | 59.48927    | 39.65516   | 15.36325   |
| R3                        | 2.491      | 51.53199   | 32.07846  | 32.41654    | 20.83776   | 6.490372   |
|                           | 4.267      | 67.07204   | 48.11404  | 51.69511    | 34.40169   | 7.875191   |
| <b>Fold change of Crl</b> |            |            |           |             |            |            |
|                           | <b>Crl</b> | <b>Pre</b> | <b>Co</b> | <b>Post</b> | <b>MBE</b> | <b>CSE</b> |
| R1                        | 1          | 12.56824   | 13.04319  | 11.30518    | 7.369949   | 2.601267   |
|                           | 1          | 16.49715   | 10.66139  | 11.61325    | 7.463845   | 2.33428    |
| R2                        | 1          | 12.11924   | 3.585714  | 9.185199    | 4.175947   | 6.384903   |
|                           | 1          | 5.570506   | 4.158652  | 4.419379    | 2.94593    | 1.141316   |
| R3                        | 1          | 20.68727   | 12.87775  | 13.01346    | 8.36522    | 2.605529   |
|                           | 1          | 15.71878   | 11.27585  | 12.1151     | 8.062265   | 1.845604   |
| AVG                       | 1.000      | 13.86      | 9.267     | 10.28       | 6.397      | 2.819      |
| SEM                       | 0.000      | 2.085      | 1.748     | 1.281       | 0.9233     | 0.7485     |

**SOD2**

| <b>Raw data</b>           |            |            |           |             |            |            |
|---------------------------|------------|------------|-----------|-------------|------------|------------|
|                           | <b>Crl</b> | <b>Pre</b> | <b>Co</b> | <b>Post</b> | <b>MBE</b> | <b>CSE</b> |
| R1                        | 0.151      | 0.305864   | 0.276426  | 0.325596    | 0.226194   | 0.137802   |
|                           | 0.266      | 0.521629   | 0.479857  | 0.570489    | 0.39461    | 0.241919   |
| R2                        | 0.164      | 0.286896   | 0.22497   | 0.289419    | 0.240946   | 0.181694   |
|                           | 0.166      | 0.286896   | 0.227364  | 0.29081     | 0.242175   | 0.181694   |
| R3                        | 0.076      | 0.949601   | 0.890308  | 0.749984    | 0.808889   | 0.279687   |
|                           | 0.05       | 0.897438   | 0.812526  | 0.655366    | 0.720378   | 0.234773   |
|                           | 0.054      | 1.081194   | 1.02194   | 1.146543    | 0.891253   | 0.325621   |
|                           | 0.024      | 0.669819   | 0.600719  | 0.690152    | 0.472057   | 0.157196   |
| <b>Fold change of Crl</b> |            |            |           |             |            |            |
|                           | <b>Crl</b> | <b>Pre</b> | <b>Co</b> | <b>Post</b> | <b>MBE</b> | <b>CSE</b> |
| R1                        | 1          | 2.02559    | 1.830638  | 2.156265    | 1.497972   | 0.912595   |
|                           | 1          | 1.96101    | 1.803974  | 2.144694    | 1.483495   | 0.909469   |
| R2                        | 1          | 1.749364   | 1.371771  | 1.764748    | 1.46918    | 1.107892   |
|                           | 1          | 1.728288   | 1.369661  | 1.751868    | 1.458885   | 1.094544   |
| R3                        | 1          | 12.49475   | 11.71458  | 9.86821     | 10.64327   | 3.680087   |
|                           | 1          | 17.94877   | 16.25052  | 13.10733    | 14.40756   | 4.695469   |
|                           | 1          | 20.02211   | 18.92481  | 21.23228    | 16.50468   | 6.03001    |
|                           | 1          | 27.90911   | 25.02995  | 28.75634    | 19.66902   | 6.549839   |
| AVG                       | 1.000      | 10.73      | 9.787     | 10.10       | 8.392      | 3.122      |
| SEM                       | 0.000      | 3.662      | 3.354     | 3.651       | 2.756      | 0.8550     |

**CAT**

| <b>Raw data</b>           |            |            |           |             |              |            |
|---------------------------|------------|------------|-----------|-------------|--------------|------------|
|                           | <b>Crl</b> | <b>Pre</b> | <b>Co</b> | <b>Post</b> | <b>Maqui</b> | <b>CSE</b> |
|                           | 0.068      | 0.238      | 0.213     | 0.171       | 0.166        | 0.154      |
|                           | 0.074      | 0.549      | 0.483     | 0.38        | 0.364        | 0.328      |
|                           | 0.032      | 0.09       | 0.037     | 0.035       | 0.079        | 0.035      |
|                           | 0.046      | 0.343      | 0.077     | 0.13        | 0.291        | 0.057      |
|                           | 0.278      | 0.856      | 0.763     | 0.697       | 0.591        | 0.338      |
|                           | 0.17       | 0.605      | 0.515     | 0.459       | 0.351        | 0.304      |
| <b>Fold change of Crl</b> |            |            |           |             |              |            |
|                           | <b>Crl</b> | <b>Pre</b> | <b>Co</b> | <b>Post</b> | <b>Maqui</b> | <b>CSE</b> |
|                           | 1          | 3.5        | 3.132353  | 2.514706    | 2.441176     | 2.264706   |
|                           | 1          | 7.418919   | 6.527027  | 5.135135    | 4.918919     | 4.432432   |
|                           | 1          | 2.8125     | 1.15625   | 1.09375     | 2.46875      | 1.09375    |
|                           | 1          | 7.456522   | 1.673913  | 2.826087    | 6.326087     | 1.23913    |
|                           | 1          | 7.494382   | 6.449438  | 5.707865    | 4.516854     | 1.674157   |
|                           | 1          | 13.42857   | 10.85714  | 9.257143    | 6.171429     | 4.828571   |
| AVG                       | 1.000      | 7.018      | 4.966     | 4.422       | 4.474        | 2.589      |
| SEM                       | 0.000      | 1.546      | 1.506     | 1.194       | 0.6992       | 0.6687     |

**GPX**

| <b>Raw data</b>           |            |            |           |             |            |            |
|---------------------------|------------|------------|-----------|-------------|------------|------------|
|                           | <b>Crl</b> | <b>Pre</b> | <b>Co</b> | <b>Post</b> | <b>MBE</b> | <b>CSE</b> |
|                           | 0.019      | 0.199167   | 0.108895  | 0.136361    | 0.199149   | 0.159238   |
|                           | 0.026      | 0.219321   | 0.175908  | 0.246284    | 0.178251   | 0.127594   |
|                           | 0.154      | 0.505031   | 0.464301  | 0.574663    | 0.366336   | 0.4328     |
|                           | 0.053      | 0.288081   | 0.26805   | 0.354816    | 0.231111   | 0.280707   |
|                           | 0.026      | 0.170715   | 0.147188  | 0.126621    | 0.10695    | 0.08064    |
|                           | 0.587      | 1.238868   | 1.450341  | 1.049143    | 0.925673   | 0.782918   |
| <b>Fold change of Crl</b> |            |            |           |             |            |            |
|                           | <b>Crl</b> | <b>Pre</b> | <b>Co</b> | <b>Post</b> | <b>MBE</b> | <b>CSE</b> |
|                           | 1          | 10.48249   | 5.731328  | 7.17688     | 10.48152   | 8.380928   |
|                           | 1          | 8.435428   | 6.76568   | 9.472467    | 6.855789   | 4.907472   |
|                           | 1          | 3.279424   | 3.014939  | 3.731578    | 2.378802   | 2.810388   |
|                           | 1          | 5.435495   | 5.057544  | 6.694644    | 4.360585   | 5.296366   |
|                           | 1          | 6.565954   | 5.66108   | 4.870026    | 4.113474   | 3.101522   |
|                           | 1          | 2.110508   | 2.470768  | 1.787296    | 1.576956   | 1.333762   |
| AVG                       | 1.000      | 5.419      | 4.355     | 4.676       | 4.330      | 3.896      |
| SEM                       | 0.000      | 1.173      | 0.5697    | 0.7829      | 1.288      | 1.032      |

Raw data of Figure 5B, 6E, 6F and 6G: Protein level measurements of Nrf2, SOD2, CAT and GPX

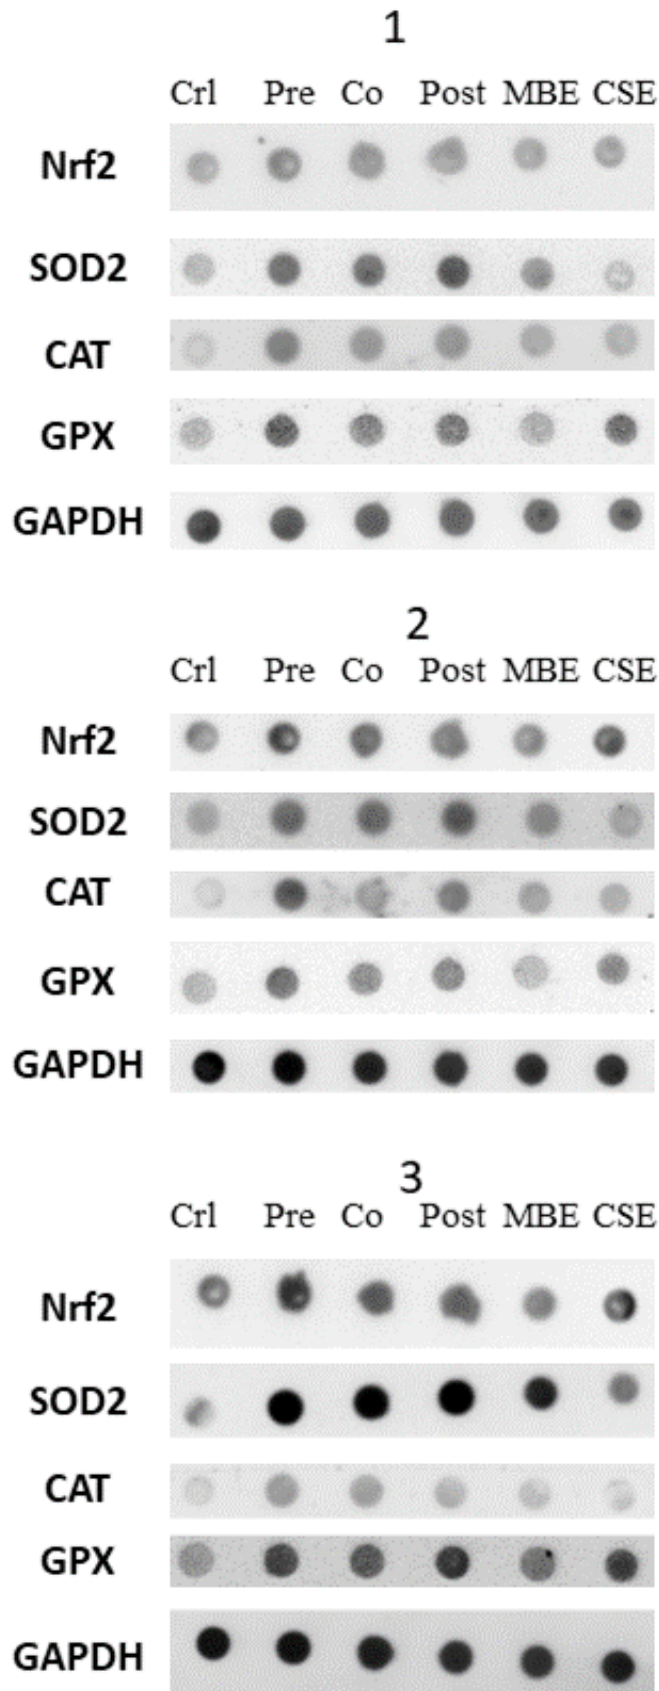

**Raw data of Figure 6A: Resazurin conversion in hOBs under different exposure strategies on day 14**

| <i>Raw data</i> |            |            |             |           |            |            |
|-----------------|------------|------------|-------------|-----------|------------|------------|
|                 | <b>CSE</b> | <b>MBE</b> | <b>Post</b> | <b>Co</b> | <b>Pre</b> | <b>CrI</b> |
| R1              | 2196       | 2738       | 1865        | 1168      | 2852       | 4352       |
|                 | 1969       | 3698       | 2714        | 2388      | 3450       | 3848       |
|                 | 2204       | 3901       | 2854        | 2706      | 4121       | 4215       |
|                 |            |            |             |           |            |            |
| R2              | 1153.5     | 2118.5     | 1438.5      | 1626.5    | 1823.5     | 2187.5     |
|                 | 990.5      | 1985.5     | 1761.5      | 1567.5    | 2702.5     | 2010.5     |
|                 | 1151.5     | 2892.5     | 1871.5      | 1766.5    | 1640.5     | 3718.5     |
|                 |            |            |             |           |            |            |
| R3              | 1142       | 3122       | 2634        | 1901      | 2380       | 3279       |
|                 | 1109       | 3525       | 3121        | 2700      | 3039       | 3317       |
|                 | 1162       | 3510       | 3240        | 3008      | 2879       | 2819       |
| AVG             | 1453.1     | 3054.5     | 2388.8      | 2092.4    | 2765.3     | 3305.2     |
| SEM             | 169.83     | 226.98     | 219.90      | 209.54    | 255.68     | 277.68     |

**Raw data of Figure 6B: SRB staining of hOBs under different exposure strategies on day 14**

| <i>Raw data</i> |            |            |             |           |            |            |
|-----------------|------------|------------|-------------|-----------|------------|------------|
|                 | <b>CSE</b> | <b>MBE</b> | <b>Post</b> | <b>Co</b> | <b>Pre</b> | <b>CrI</b> |
| R1              | 0.184      | 0.283      | 0.208       | 0.243     | 0.262      | 0.377      |
|                 | 0.101      | 0.155      | 0.145       | 0.116     | 0.219      | 0.301      |
|                 | 0.071      | 0.352      | 0.163       | 0.196     | 0.172      | 0.292      |
|                 |            |            |             |           |            |            |
| R2              | 0.121      | 0.708      | 0.438       | 0.455     | 0.585      | 0.549      |
|                 | 0.168      | 0.591      | 0.508       | 0.297     | 0.338      | 0.426      |
|                 | 0.188      | 0.391      | 0.32        | 0.249     | 0.397      | 0.69       |
|                 |            |            |             |           |            |            |
| R3              | 0.182      | 0.555      | 0.423       | 0.369     | 0.445      | 0.436      |
|                 | 0.124      | 0.298      | 0.399       | 0.487     | 0.526      | 0.369      |
|                 | 0.103      | 0.512      | 0.369       | 0.452     | 0.398      | 0.541      |
| AVG             | 0.1380     | 0.4272     | 0.3303      | 0.3182    | 0.3713     | 0.4423     |
| SEM             | 0.0144     | 0.0587     | 0.0434      | 0.0432    | 0.0460     | 0.0433     |

**Raw data of Figure 6D: AP activity of hOBs under different exposure strategies on day 14**

| <i>Raw data</i> |            |            |             |           |            |            |
|-----------------|------------|------------|-------------|-----------|------------|------------|
|                 | <b>CSE</b> | <b>MBE</b> | <b>Post</b> | <b>Co</b> | <b>Pre</b> | <b>Crl</b> |
| R1              | 0.535326   | 1.966431   | 0.944712    | 0.829218  | 1.456107   | 1.754642   |
|                 | 0.688119   | 2.022581   | 1.975862    | 1.030172  | 1.125571   | 1.931894   |
|                 | 1.626761   | 1.03267    | 1.119632    | 1.461735  | 2.688953   | 2.738014   |
|                 |            |            |             |           |            |            |
| R2              | 1.259082   | 1.544846   | 1.632239    | 2.466063  | 1.87594    | 2.119977   |
|                 | 0.860017   | 1.790245   | 2.45139     | 3.475612  | 3.911572   | 3.024688   |
|                 | 0.447208   | 2.578921   | 1.779948    | 4.714471  | 3.004216   | 2.907288   |
|                 |            |            |             |           |            |            |
| R3              | 1.049451   | 1.356757   | 0.669031    | 0.823848  | 1.829213   | 2.238532   |
|                 | 0.41129    | 4.030201   | 1.077694    | 0.406571  | 1.671103   | 3.105691   |
|                 | 0.291262   | 1.96875    | 0.387534    | 0.325221  | 1.417085   | 1.512015   |
| AVG             | 0.7965     | 2.032      | 1.338       | 1.726     | 2.109      | 2.370      |
| SEM             | 0.1480     | 0.2899     | 0.2220      | 0.5057    | 0.3024     | 0.1965     |

**Raw data of Figure 6E: Alizarin-red staining of hOBs under different exposure strategies on day 21**

| <i>Raw data</i>           |            |             |           |            |            |            |
|---------------------------|------------|-------------|-----------|------------|------------|------------|
|                           | <b>MBE</b> | <b>Post</b> | <b>Co</b> | <b>Pre</b> | <b>CSE</b> | <b>Crl</b> |
| R1                        | 1.451      | 0.858       | 0.661     | 0.998      | 0.236      | 2.274      |
|                           | 1.243      | 0.35        | 0.414     | 0.536      | 0.569      | 1.78       |
|                           | 1.172      | 0.904       | 0.212     | 1.282      | 0.291      | 1.034      |
|                           |            |             |           |            |            |            |
| R2                        | 1.749      | 0.703       | 0.877     | 0.862      | 0.558      | 1.184      |
|                           | 1.276      | 0.554       | 0.657     | 1.573      | 0.086      | 1.572      |
|                           | 1.162      | 0.668       | 0.472     | 1.062      | 0.081      | 1.205      |
|                           |            |             |           |            |            |            |
| R3                        | 1.362      | 1.132       | 1.155     | 1.555      | 1          | 2.893      |
|                           | 2.091      | 1.652       | 1.228     | 1.782      | 0.981      | 1.982      |
|                           | 2.109      | 1.293       | 1.521     | 1.891      | 0.789      | 1.789      |
| <b>Fold change of Crl</b> |            |             |           |            |            |            |
|                           | <b>MBE</b> | <b>Post</b> | <b>Co</b> | <b>Pre</b> | <b>CSE</b> | <b>Crl</b> |
| R1                        | 0.6380827  | 0.3773087   | 0.2906772 | 0.4388742  | 0.1037819  | 1          |
|                           | 0.6983146  | 0.1966292   | 0.2325843 | 0.3011236  | 0.3196629  | 1          |
|                           | 1.1334623  | 0.8742747   | 0.205029  | 1.2398453  | 0.2814313  | 1          |
|                           |            |             |           |            |            |            |
| R2                        | 1.477196   | 0.59375     | 0.7407095 | 0.7280405  | 0.4712838  | 1          |
|                           | 0.8117048  | 0.3524173   | 0.4179389 | 1.0006361  | 0.0547074  | 1          |
|                           | 0.9643154  | 0.5543569   | 0.3917012 | 0.8813278  | 0.0672199  | 1          |
|                           |            |             |           |            |            |            |
| R3                        | 0.4707916  | 0.3912893   | 0.3992395 | 0.5375043  | 0.3456619  | 1          |
|                           | 1.054995   | 0.8335015   | 0.6195762 | 0.8990918  | 0.4949546  | 1          |
|                           | 1.1788709  | 0.7227501   | 0.8501956 | 1.0570151  | 0.4410285  | 1          |
| AVG                       | 0.9364     | 0.5440      | 0.4609    | 0.7871     | 0.2866     | 1.000      |
| SEM                       | 0.1043     | 0.07781     | 0.07565   | 0.1033     | 0.05789    | 0.000      |
